# Supplementary material for: Interaction between RECQL4 and OGG1 promotes repair of oxidative base lesion 8-oxoG and is regulated by SIRT1 deacetylase
Source: PubMed Central journal article supplement — Nucleic Acids Res. 2020 May 20;48(12):6530–46. doi: 10.1093/nar/gkaa392 (PMC7337523; doi:10.1093/nar/gkaa392), 2020-05-20
Supplement: gkaa392_supplemental_file.pdf [file gkaa392_supplemental_file.pdf]

# Supplementary data

## Supplementary Figure S1

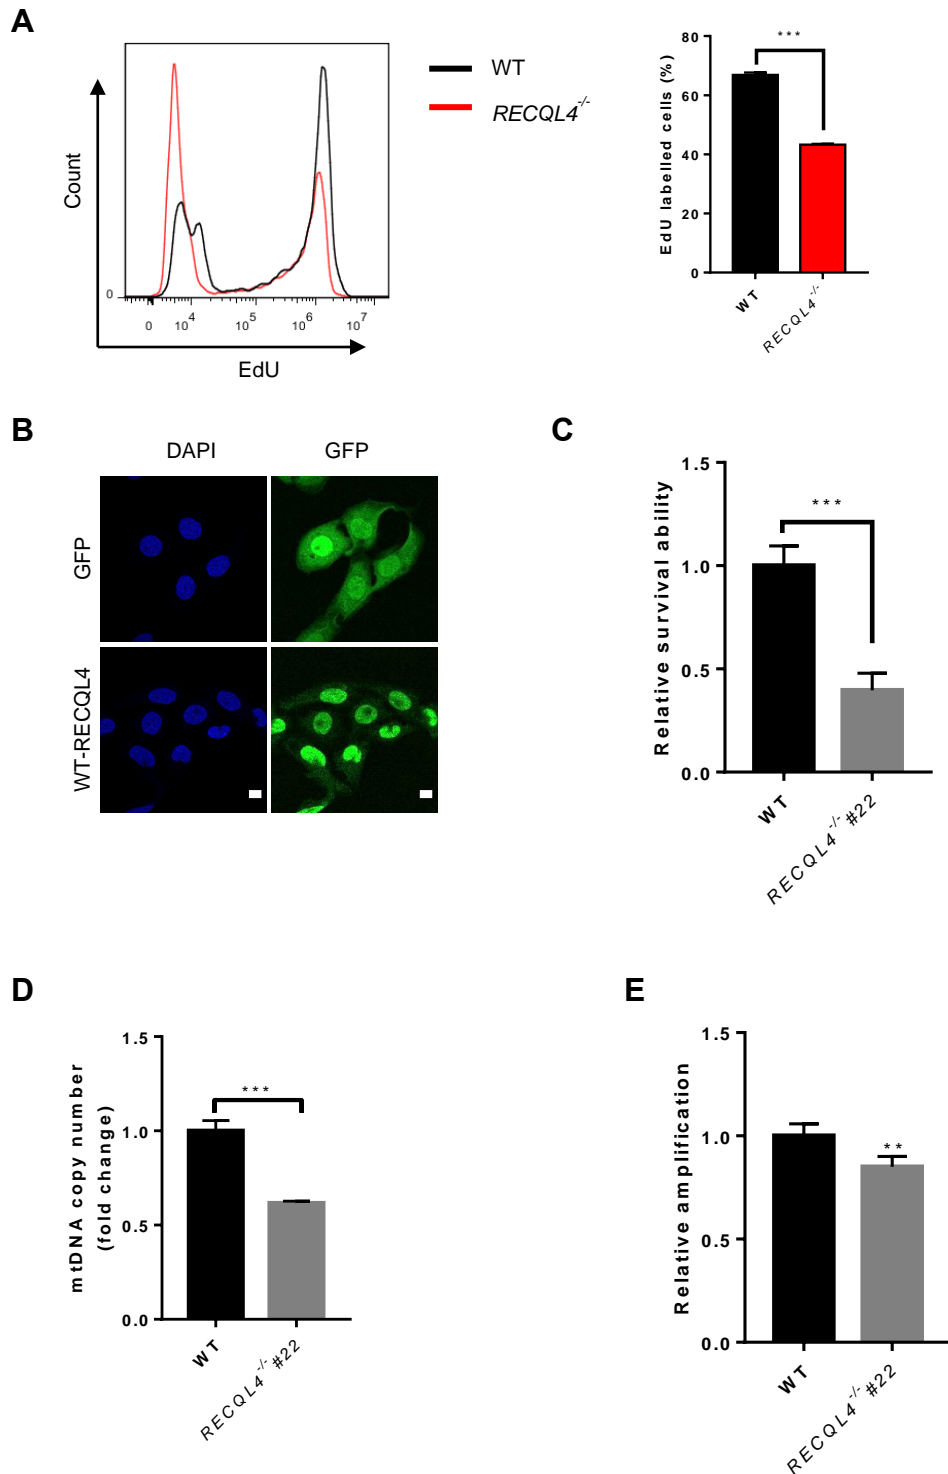

## Supplementary Figure S1 | Characterization of RECQL4 knockout cells

**(A)** Detection of EdU incorporation in WT and *RECQL4*<sup>-/-</sup> cells by flow cytometry. WT and *RECQL4*<sup>-/-</sup> cells were incubated with 10 μM EdU for 1 h. A representative histogram plot of EdU-labeled cells is shown on the left. The graph on the right shows quantification of the ratio of EdU-positive cells in WT and *RECQL4*<sup>-/-</sup> cells. Data are shown as mean ± SD from two independent experiments. \*\*\**P* < 0.001, using unpaired two-tailed Student's *t* test. **(B)** Immunofluorescence images confirm the overexpression of GFP vector or GFP-tagged WT-RECQL4 in *RECQL4*<sup>-/-</sup> cells. Scale bar, 10 μm. **(C)** Colony formation assay showing another *RECQL4*-deficient cell line (*RECQL4*<sup>-/-</sup> #22) has similar clonogenic survival defects. Data are shown as mean ± SEM, *n* = 3. \*\*\**P* < 0.001 (t-test). **(D)** mtDNA copy number in WT and *RECQL4*-deficient cells (*RECQL4*<sup>-/-</sup> #22). Data are shown as mean ± SEM, *n* = 3. \*\*\**P* < 0.001 (t-test). **(E)** mtDNA damage analysis in *RECQL4*-deficient cells (*RECQL4*<sup>-/-</sup> #22). Quantifications are shown as mean ± SEM, *n* = 3. \*\**P* < 0.01.

## Supplementary Figure S2

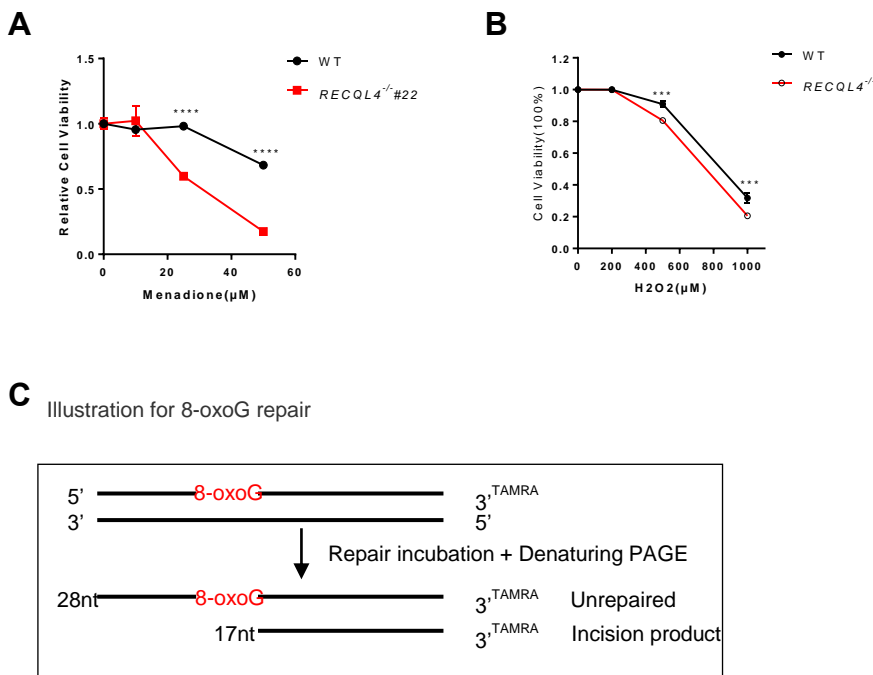

## Supplementary Figure S2 | RECQL4 is required for BER of 8-oxoG

(A) MTS assay measuring cell viability of WT and RECQL4-deficient cells (*RECQL4*<sup>-/-</sup> #22) treated with menadione. Data are shown as mean ± SEM, n = 3. \*\*\*\**P* < 0.0001 (t-test). (B) MTS assay showing cell viability of WT and RECQL4 knockout cells treated with H<sub>2</sub>O<sub>2</sub>. Data are shown as mean ± SEM, n = 3. \*\*\**P* < 0.001 (t-test). (C) Schematic rationale of BER analysis of 8-oxoG repair *in vitro*. DNA substrates were labelled with Carboxytetramethylrhodamine (TAMRA) at the 3' terminus.

## Supplementary Figure S3

**A**

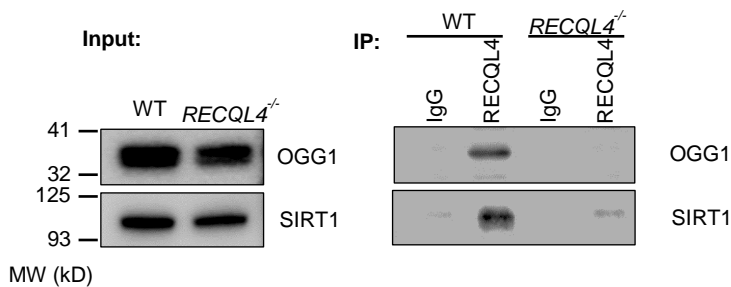

**C**

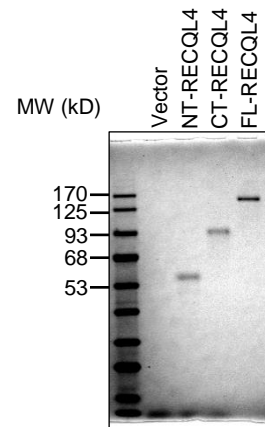

**B**

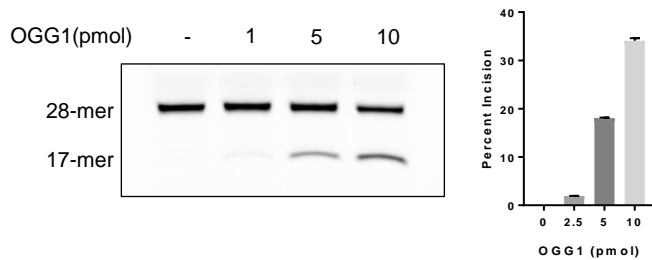

## Supplementary Figure S3 | RECQL4 selectively interacts with OGG1 and promotes 8-oxoG repair

(A) Co-immunoprecipitation of endogenous OGG1 and SIRT1 by RECQL4 antibody from U2OS cells extracts in the presence of benzonase nuclease. (B) Representative gel (left) and quantification (right) of the 8-oxoG incision activity of OGG1 alone. (C) Coomassie blue staining gels with purified 3xFLAG-NT-RECQL4, 3xFLAG-CT-RECQL4, and 3xFLAG-FL-RECQL4 used for *in vitro* 8-oxoG incision assay, related to Figure 3F.

## Supplementary Figure S4

**A**

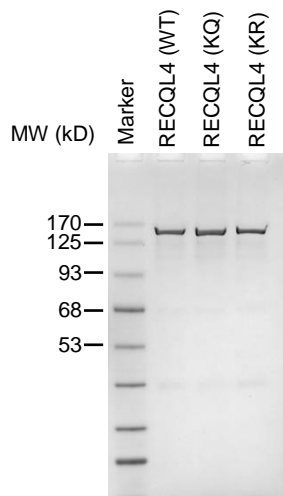

**C**

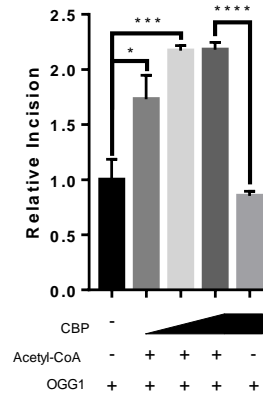

**B**

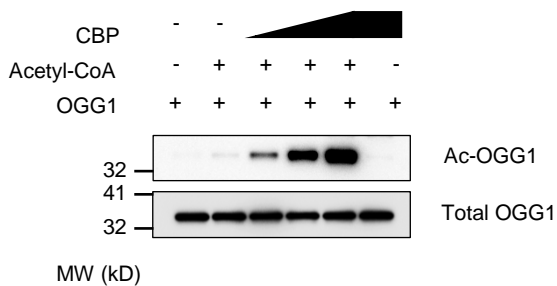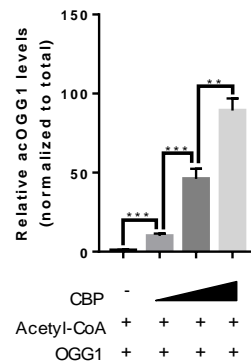

**Supplementary Figure S4 | RECQL4 is an acetylated protein and its acetylation is stimulated by oxidative stress** (A) Coomassie blue staining gels with purified RECQL4 (WT), RECQL4 (KQ), and RECQL4(KR) used for *in vitro* acetylation and deacetylation assays, related to Figure 4C and Figure 5D. (B) *In vitro* acetylation of OGG1 by CBP. Recombinant OGG1(1 $\mu$ g), Acetyl-CoA (2 mM), and different amounts of recombinant CBP (0.1 $\mu$ g, 0.2 $\mu$ g, 0.5 $\mu$ g) were incubated at 30°C for 1 h. Acetylated and total OGG1 proteins were assessed with an anti-acetylated OGG1 antibody (K338 + K341) and an anti-OGG1 antibody, respectively. A representative gel is shown on the left. The graph on the right shows quantification of relative acetylated OGG1 levels normalized to total OGG1. Data are shown as mean  $\pm$  SD from two independent experiments. \*\* $P < 0.01$ , \*\*\* $P < 0.001$ , using unpaired two-tailed Student's t test. (C) BER assay measuring 8-oxoG incision activity showing that acetylation of OGG1 enhances its catalytic activity *in vitro*. Data are shown as mean  $\pm$  SD from two independent experiments. \* $P < 0.05$ , \*\* $P < 0.01$ , \*\*\* $P < 0.001$ , using unpaired two-tailed Student's t test.

## Supplementary Figure S5

**A**

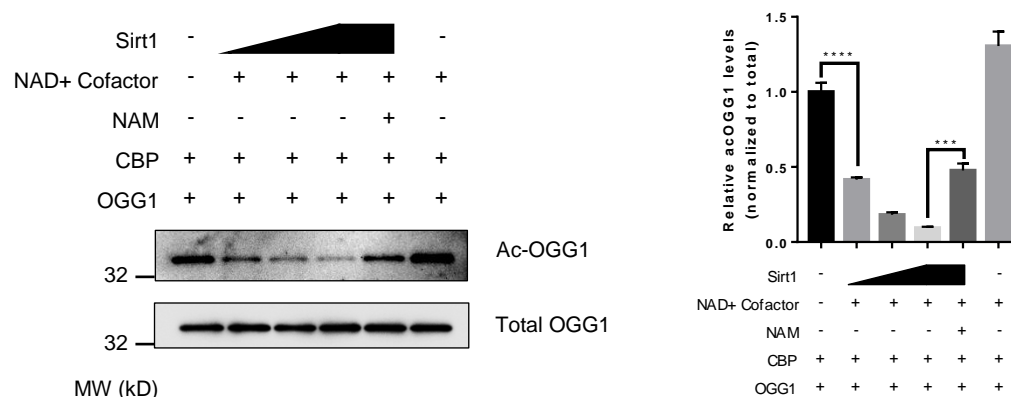

## Supplementary Figure S5 | SIRT1 interacts with and deacetylates RECQL4

(A) Deacetylation of OGG1 by SIRT1 *in vitro*. Recombinant OGG1 (1  $\mu$ g) was first acetylated by CBP (0.1  $\mu$ g) for the first 1 h, then acetylated OGG1 was incubated with NAD<sup>+</sup> (50  $\mu$ M), and different amounts of recombinant SIRT1 (0.5 U, 1 U, 2 U) at 30°C for an additional 1 h. Acetylated and total

OGG1 proteins were assessed with an anti-acetylated OGG1 antibody and an anti-OGG1 antibody, respectively. A representative gel is shown on the left. The graph on the right shows quantification of relative acetylated OGG1 levels normalized to total OGG1. Data are shown as mean  $\pm$  SD from two independent experiments.  $***P < 0.001$ ,  $****P < 0.0001$ , using unpaired two-tailed Student's t test.

## Supplementary Figure S6

**A**

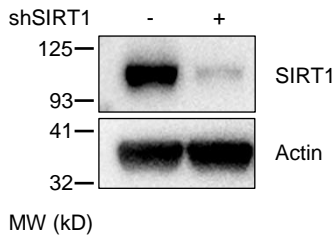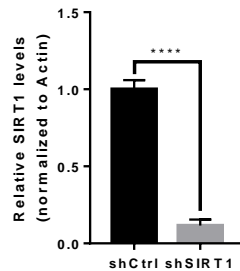

**B**

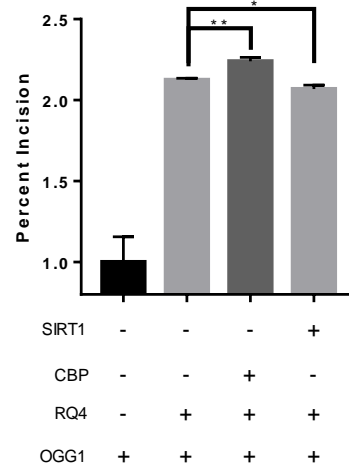

**Supplementary Figure S6 | SIRT1 controls the interaction between OGG1 and RECQL4 following oxidative stress and maintains RECQL4 in a hypoacetylated state (A)** Western blot showing reduced SIRT1 protein levels in shRNA-mediated SIRT1-knockdown cells. A representative gel is shown on the left. The graph on the right shows quantification of relative acetylated OGG1 levels normalized to total OGG1. Data are shown as mean  $\pm$  SD from four independent experiments.  $****P < 0.0001$ , using unpaired two-tailed Student's t test. **(B)** BER assay measuring 8-oxoG incision activity shows that RECQL4 stimulates the catalytic activity of OGG1 in the presence of CBP, but not in the presence of SIRT1. Acetyl CoA and NAD<sup>+</sup> co-substrate were used, respectively. Data are shown as mean  $\pm$  SD from two independent experiments.  $*P < 0.05$ ,  $**P < 0.01$ , using unpaired two-tailed Student's t test.
